# Supplementary material for: Functional Antagonism of WRI1 and TCP20 Modulates GH3.3 Expression to Maintain Auxin Homeostasis in Roots
Source: MDPI journal article supplement (doi:10.3390/plants11030454), 2022-02-07
Supplement: s1 [file s1]

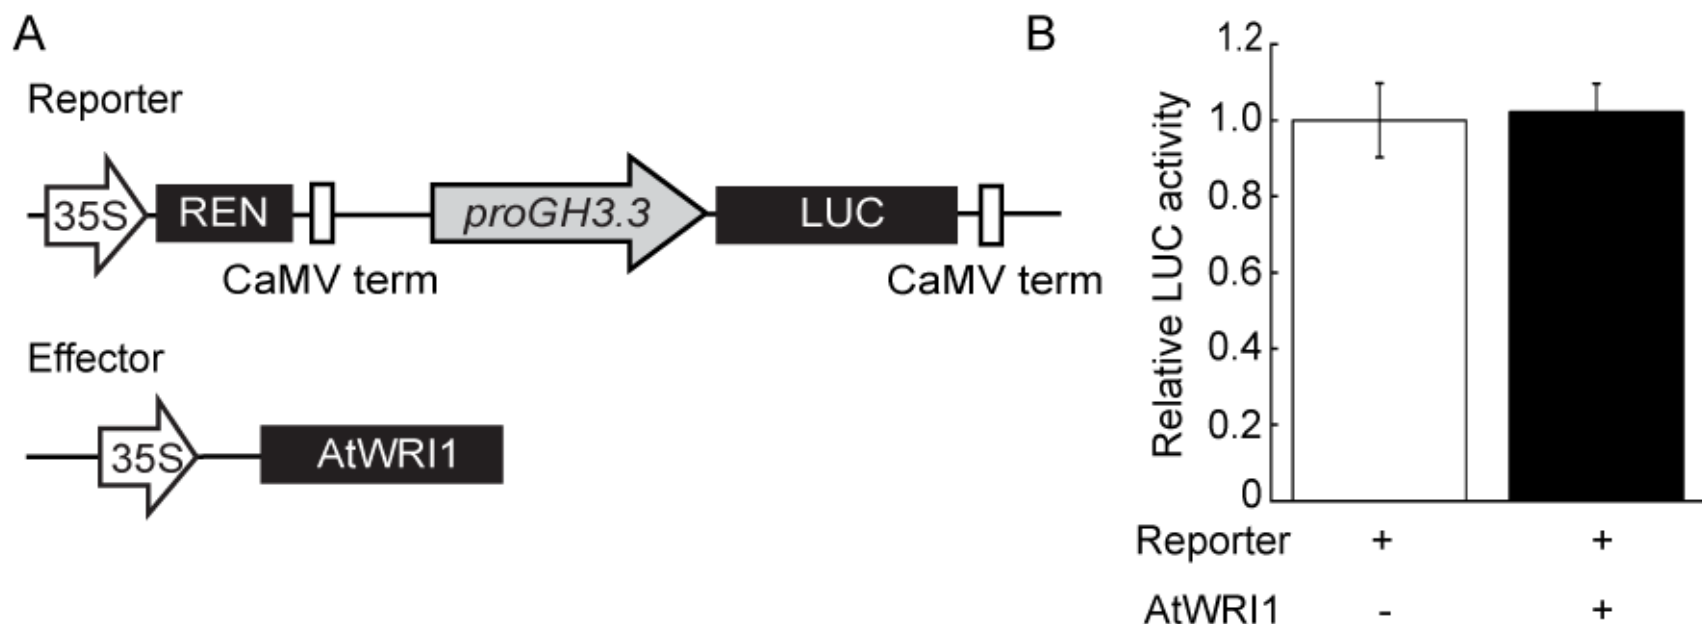

**Figure S1.** Transactivation of the firefly luciferase (LUC) reporter by AtWRI1. A) Schematic representation of constructs used in a transient expression assay in *N. benthamiana* leaves. The *LUC* reporter gene was driven by a 2kb promoter of *GH3.3* (*proGH3.3*). The *Renilla* luciferase (*REN*) reporter gene was controlled by the *CaMV* 35S promoter. B) Relative reporter activity in *N. benthamiana* leaves transiently expressing the effector and reporter constructs as indicated. The LUC activity was normalized to the REN activity. Results are shown as means  $\pm$  SE (n=6).

| Probe   | Relative distance<br>to TSS | Sequence                                                                                                                       |
|---------|-----------------------------|--------------------------------------------------------------------------------------------------------------------------------|
| 1<br>1M | -84                         | TCTAACGATAACAAA <u>CCGAGCCCAC</u> TTTTATGTCGACGTGGAATTTGGCT<br>TCTAACGATAACAAA <u>CCaAGaaaAa</u> TTTTATGTCGACGTGGAATTTGGCT     |
| 2<br>2M | -125                        | ATGTCTGCCCAAAGACTAGCCAAAGATTACGTGACC <u>GCGGTCCCTC</u> TTGTCC<br>ATGTCTGCCCAAAGACTAGCCAAAGATTACGTGACC <u>GCaataaTa</u> TTGTCC  |
| 3<br>3M | -170                        | GACATATCAGT <u>CCCAC</u> ATGTCTGCCCAAAGACTAGCCAAAGATTACGTGACC<br>GACATATC <u>aTa</u> aaaAaATGTCTGCCCAAAGACTAGCCAAAGATTACGTGACC |
| 4<br>4M | -944                        | CTATATATTTTAAATATT <u>TAGGTCCC</u> ATTAAATCAGTTTGTGATTTCAGA<br>CTATATATTTTAAATATT <u>TAaataaaAT</u> TAAATCAGTTTGTGATTTCAGA     |

**Figure S2.** *In silico* analysis of TCP binding sites in *proGH3.3*. Putative TCP binding sites were identified by AthaMap (<http://www.athamap.de/index.php>) in the *GH3.3* promoter region (from 2kb upstream of TSS (transcription start site) to 200bp downstream of TSS). Putative TCP binding sites were highlighted in red. The nucleotide sequences of the wild-type (1-4) and mutated (1M-4M) probes are indicated. The core sequence of TCP binding motif is underlined. The mutations of the TCP binding sequence in the M probes are indicated by italicized small letters.

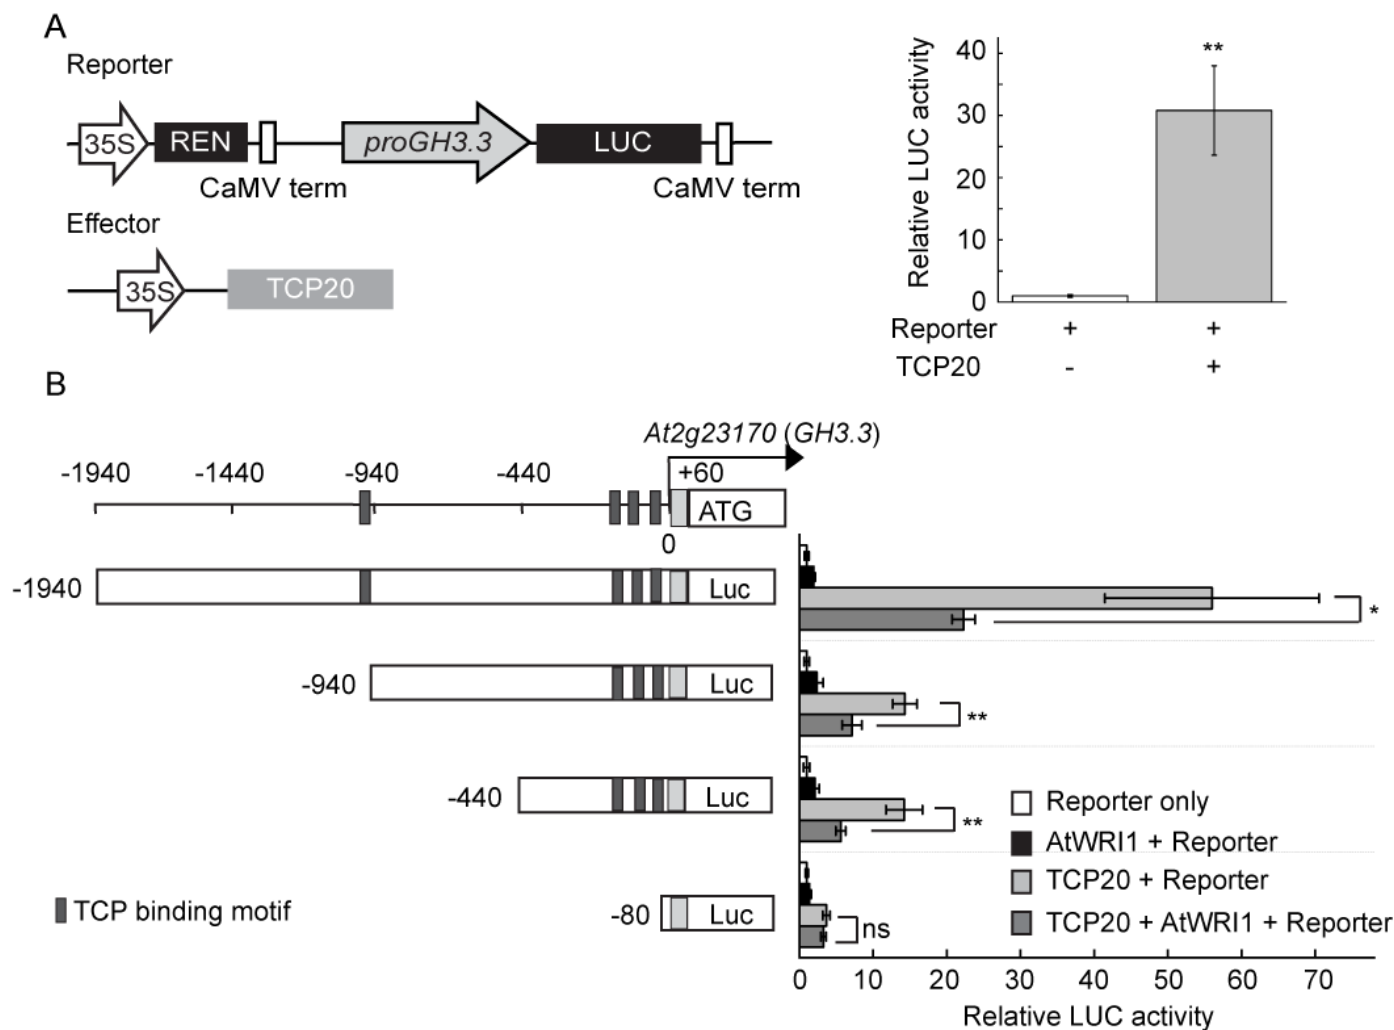

**Figure S3.** Transactivation of the LUC reporter by TCP20 in *N. benthamiana* leaves. A) Schematic representation of the constructs used in a transient expression assay in *N. benthamiana* leaves. The *LUC* reporter gene was driven by a 2kb *proGH3.3*. The *REN* reporter gene was controlled by the *CaMV* 35S promoter. Relative reporter activity in *N. benthamiana* leaves, infiltrated either using the reporter alone or in combination with the effector, was shown. The LUC activity was normalized to the REN activity. Results are shown as means  $\pm$  SE (n=5-6). “\*\*\*” indicates a significant difference ( $P<0.01$ , one-way ANOVA) between reporter alone and co-transformation of TCP20 and reporter. B) The transactivation activity of TCP20 on the *proGH3.3* deletion fragments in *N. benthamiana* leaves. Co-expression of *AtWRI1* with *TCP20* repressed the transactivation activity of TCP20. Results are shown as means  $\pm$  SE (n=4-6). “\*” and “\*\*” indicate significant differences ( $P<0.05$  and  $P<0.01$ , respectively, one-way ANOVA) between sole expression of *TCP20* and co-expression of *AtWRI1* with *TCP20* as indicated. ‘ns’ represents no statistical significance as determined by one-way ANOVA.

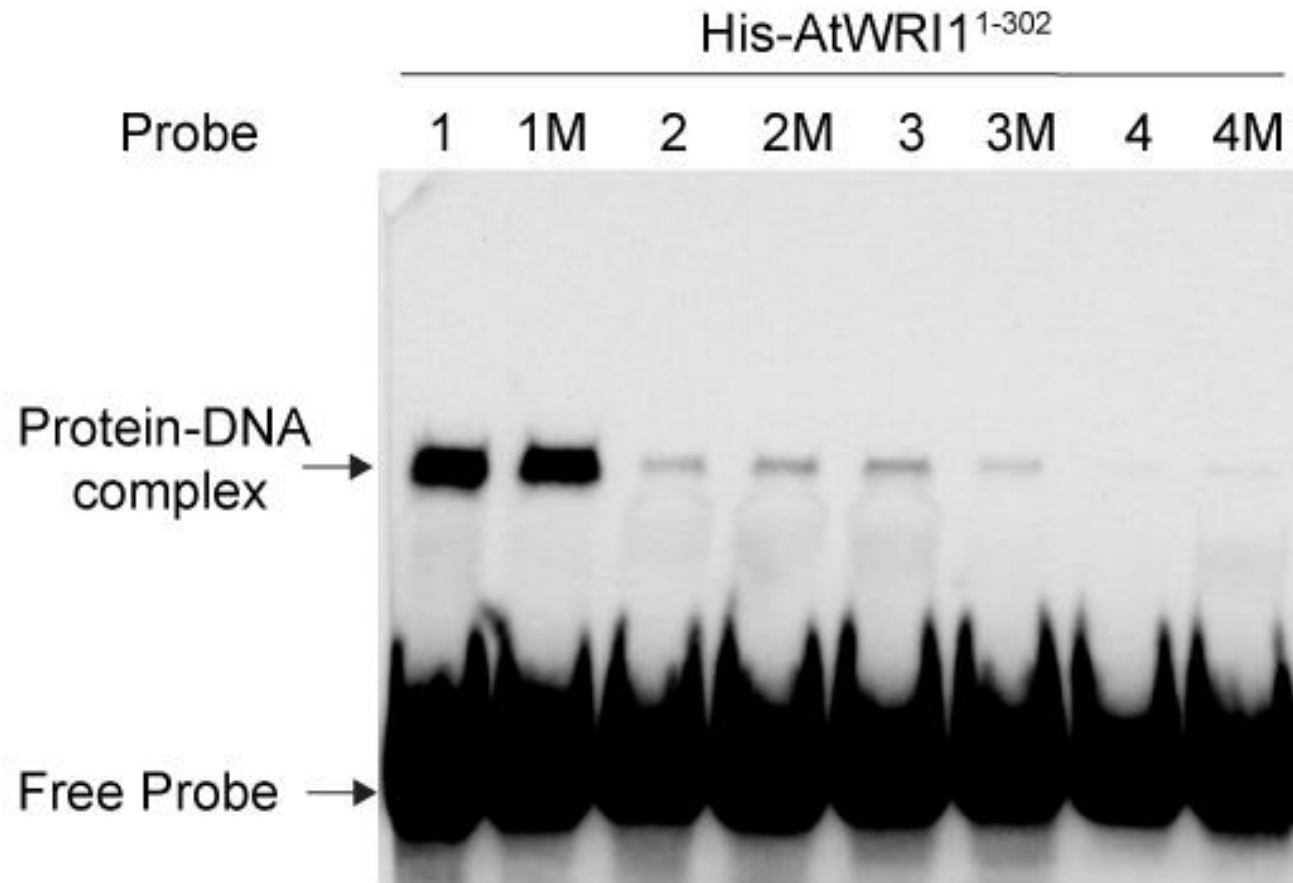

**Figure S4.** Examination of AtWRI1 binding to *proGH3.3* fragments that are also recognized by TCP20. AtWRI1<sup>1-302</sup> binds to probe 1-4 as well as probe 1M-4M (see Figure S2) in EMSA.

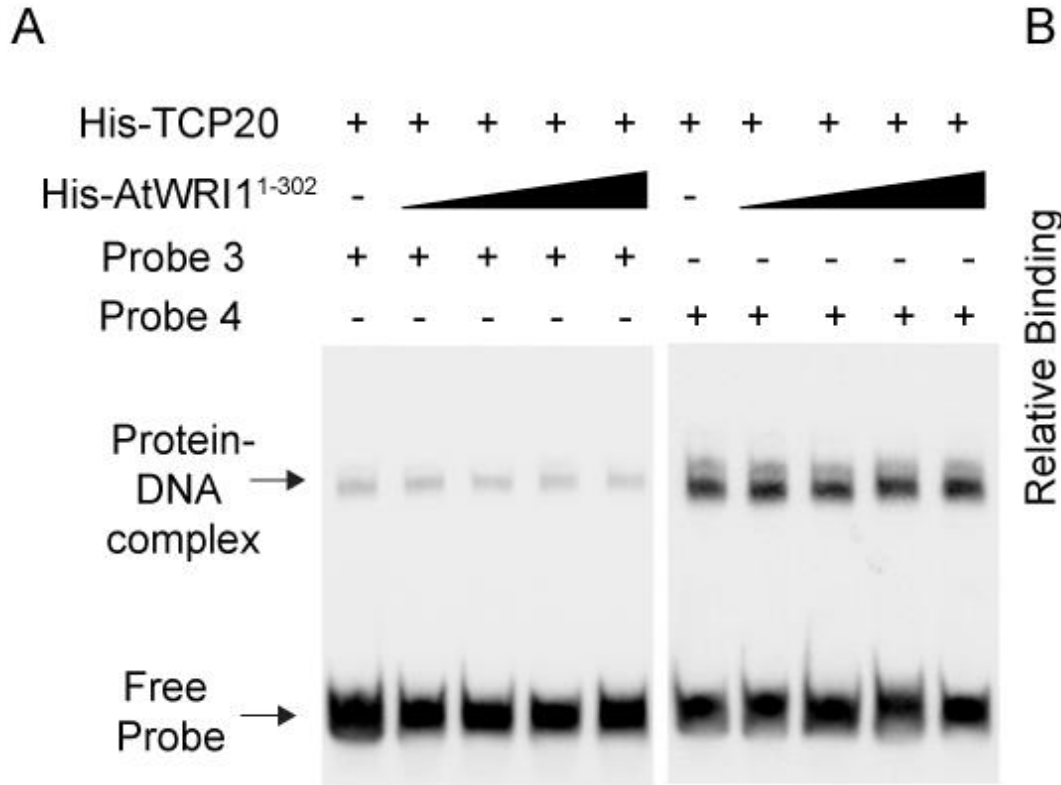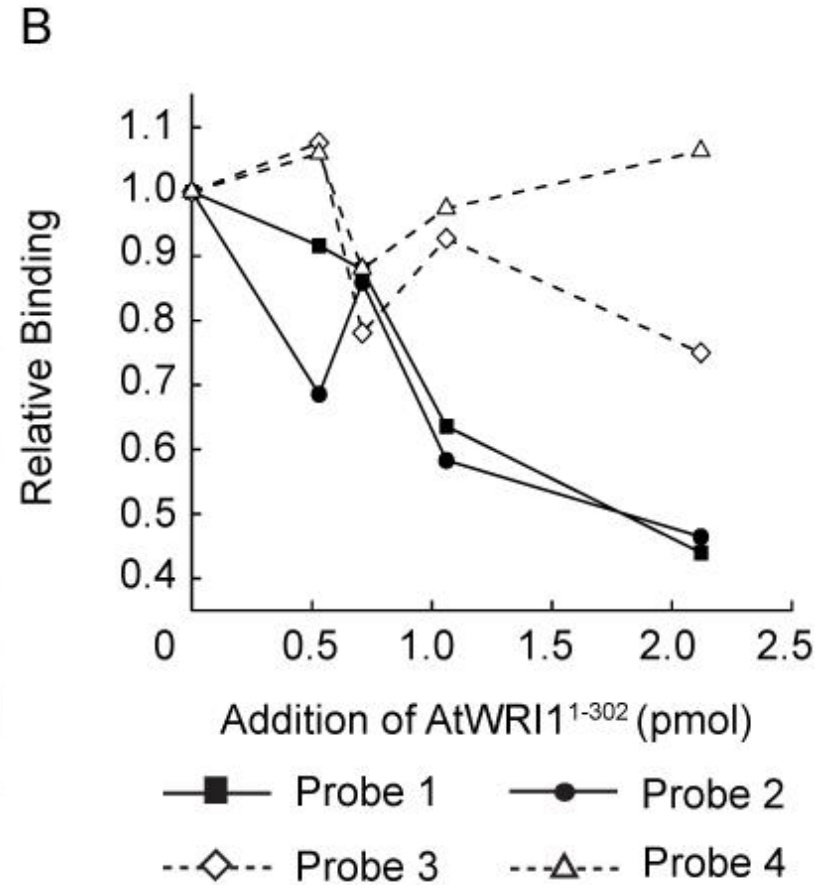

**Figure S5.** Effects of AtWRI1 on TCP20 binding to *proGH3.3*. A) EMSA showed the binding of TCP20 to *proGH3.3* (probe 3 and 4) in presence of increasing amount of AtWRI1<sup>1-302</sup> (0.53, 0.71, 1.06, and 2.12 pmol, respectively). B) Relative binding of TCP20 to probe 1-4 in the presence of increasing amount of AtWRI1<sup>1-302</sup> as shown in Figure 3C and Figure S5A.

**Table S1.** Primers used for plasmid construction in this study.

| <b>Primer Name</b>              | <b>Sequence 5' to 3'</b>              |
|---------------------------------|---------------------------------------|
| AtWRI1-FW                       | 5'-AATGGATCCGGACAATGAAGAAGCGCTTA-3'   |
| AtWRI1-RV                       | 5'-TCCCTCGAGTCAGACCAAATAGTT-3'        |
| AtWRI1 <sup>58-240</sup> -FW    | 5'-GCAGGATCCATGCTTCTACCCGA-3'         |
| AtWRI1 <sup>1-240</sup> -RV     | 5'-TAACTCGAGTTACGGGAAAACACC-3'        |
| AtWRI1 <sup>1-306</sup> -RV     | 5'-TGA CTCGAGTCATTCTTCTGAATATCC-3'    |
| TCP20-FW                        | 5'-CGCAGATCTATGGATCCCAAGAACCTA-3'     |
| TCP20-RV                        | 5'-TCCCTCGAGTTAACGACCTGAGCCTTG-3'     |
| <sub>pro</sub> GH3.3 (-1940)-FW | 5'-ACTCTCGAGTATTAATTTTTATATCTTATT-3'  |
| <sub>pro</sub> GH3.3 (-940)-FW  | 5'-ACTCTCGAGATCAGTTTGTGATTTTCAGAAT-3' |
| <sub>pro</sub> GH3.3 (-440)-FW  | 5'-ACTCTCGAGTCACACACATACTCTAATTCA-3'  |
| <sub>pro</sub> GH3.3 (-80)-FW   | 5'-ACTCTCGAGTATGTCGACGTGGAATTTGGC-3'  |
| <sub>pro</sub> GH3.3-RV         | 5'-GCTGGATCCGATTAATAATGGTATTTGTAAG-3' |

**Table S2.** Primers used for quantitative real-time PCR (qRT-PCR) in this study.

| <b>Primer Name</b> | <b>Sequence 5' to 3'</b>         |
|--------------------|----------------------------------|
| GH3.3-FW           | 5'-ATCAGTACAAGGTGCCGAGG-3'       |
| GH3.3-RV           | 5'-AAAGCTGGGCTGAAGTGTGT-3'       |
| IPP2-FW            | 5'-GAGAAAGGAACTTTGGTTGAAGC -3'   |
| IPP2-RV            | 5'-GTTTTGTAAGTGTCTCACATATCCC -3' |
